# Supplementary material for: Unusual structural changes going from Li+to Cs+in [W(CN)6(bpy)]2−ion salts: the Na+case
Source: Royal Society of Chemistry journal article supplement (doi:10.1039/d1ce00328c), 2021-01-01
Supplement: d1ce00328c1.pdf [file d1ce00328c1.pdf]

## Supplementary Information

### Unusual structure changes going from Li<sup>+</sup> to Cs<sup>+</sup> in [W(CN)<sub>6</sub>(bpy)]<sup>2-</sup> ion salts. The Na<sup>+</sup> case.

Maciej Hodorowicz\*, Anna Jurowska and Janusz Szklarzewicz

Jagiellonian University, Faculty of Chemistry, Gronostajowa 2, 30-387 Kraków, Poland

\*corresponding author e-mail: hodorowm@chemia.uj.edu.pl

**Table S1.** Bond lengths [Å] and angles [°] for **1** and **2**.

| <b>1</b>     |          |                    |            | <b>2</b>    |          |                  |            |
|--------------|----------|--------------------|------------|-------------|----------|------------------|------------|
| Bond length  |          | Angle              |            | Bond length |          | Angle            |            |
| W(1)-C(15)   | 2.143(5) | C(15)-W(1)-C(16)   | 69.77(18)  | W(1)-C(14)  | 2.144(5) | C(14)-W(1)-C(13) | 71.2(2)    |
| W(1)-C(16)   | 2.157(5) | C(15)-W(1)-C(14)   | 71.23(18)  | W(1)-C(13)  | 2.144(6) | C(14)-W(1)-C(15) | 112.7(2)   |
| W(1)-C(14)   | 2.159(5) | C(16)-W(1)-C(14)   | 111.02(18) | W(1)-C(15)  | 2.153(6) | C(13)-W(1)-C(15) | 69.2(3)    |
| W(1)-C(13)   | 2.164(5) | C(15)-W(1)-C(13)   | 74.06(19)  | W(1)-C(16)  | 2.156(5) | C(14)-W(1)-C(16) | 72.16(18)  |
| W(1)-C(18)#1 | 2.166(5) | C(16)-W(1)-C(13)   | 137.37(19) | W(1)-C(12)  | 2.158(5) | C(13)-W(1)-C(16) | 111.4(3)   |
| W(1)-C(17)   | 2.172(5) | C(14)-W(1)-C(13)   | 76.71(18)  | W(1)-C(11)  | 2.161(6) | C(15)-W(1)-C(16) | 74.7(2)    |
| W(1)-N(1)    | 2.215(4) | C(15)-W(1)-C(18)#1 | 77.38(18)  | W(1)-N(1)   | 2.216(4) | C(14)-W(1)-C(12) | 139.78(18) |
| W(1)-N(12)   | 2.227(4) | C(16)-W(1)-C(18)#1 | 78.99(18)  | W(1)-N(2)   | 2.234(4) | C(13)-W(1)-C(12) | 78.6(2)    |

|             |          |                    |            |               |           |                  |            |
|-------------|----------|--------------------|------------|---------------|-----------|------------------|------------|
| W(2)-C(36)  | 2.135(5) | C(14)-W(1)-C(18)#1 | 140.28(19) | Na(1)-O(1A)   | 1.980(9)  | C(15)-W(1)-C(12) | 79.02(19)  |
| W(2)-C(37)  | 2.153(6) | C(13)-W(1)-C(18)#1 | 71.66(18)  | Na(1)-O(2)    | 2.091(9)  | C(16)-W(1)-C(12) | 145.64(18) |
| W(2)-C(35)  | 2.155(5) | C(15)-W(1)-C(17)   | 112.13(19) | Na(1)-N(7)    | 2.302(9)  | C(14)-W(1)-C(11) | 76.10(19)  |
| W(2)-C(34)  | 2.163(5) | C(16)-W(1)-C(17)   | 74.13(18)  | Na(1)-N(3)#1  | 2.333(8)  | C(13)-W(1)-C(11) | 74.6(3)    |
| W(2)-C(38)  | 2.164(5) | C(14)-W(1)-C(17)   | 71.18(17)  | Na(1)-O(1B)   | 2.348(10) | C(15)-W(1)-C(11) | 136.5(3)   |
| W(2)-C(33)  | 2.167(5) | C(13)-W(1)-C(17)   | 142.40(17) | Na(1)-O(1A)#2 | 2.386(9)  | C(16)-W(1)-C(11) | 143.1(2)   |
| W(2)-N(32)  | 2.208(4) | C(18)#1-W(1)-C(17) | 145.45(18) | Na(1)-C(15)   | 3.047(8)  | C(12)-W(1)-C(11) | 70.7(2)    |
| W(2)-N(21)  | 2.233(4) | C(15)-W(1)-N(1)    | 142.92(16) | Na(1)-Na(2)   | 3.542(5)  | C(14)-W(1)-N(1)  | 80.87(16)  |
| Na(1)-N(18) | 2.398(5) | C(16)-W(1)-N(1)    | 145.81(17) | Na(1)-Na(1)#2 | 3.644(9)  | C(13)-W(1)-N(1)  | 144.0(2)   |
| Na(1)-O(2)  | 2.429(4) | C(14)-W(1)-N(1)    | 81.59(16)  | Na(2)-N(5B)   | 2.349(14) | C(15)-W(1)-N(1)  | 145.0(2)   |
| Na(1)-O(1)  | 2.508(4) | C(13)-W(1)-N(1)    | 75.51(17)  | Na(2)-O(3)    | 2.413(7)  | C(16)-W(1)-N(1)  | 79.76(18)  |
| Na(1)-N(15) | 2.515(5) | C(18)#1-W(1)-N(1)  | 112.18(17) | Na(2)-O(1A)#2 | 2.418(7)  | C(12)-W(1)-N(1)  | 112.14(16) |
| Na(1)-N(38) | 2.523(4) | C(17)-W(1)-N(1)    | 80.87(17)  | Na(2)-N(4)#3  | 2.447(5)  | C(11)-W(1)-N(1)  | 77.0(2)    |
| Na(1)-O(7)  | 2.714(4) | C(15)-W(1)-N(12)   | 142.71(16) | Na(2)-O(2)    | 2.460(6)  | C(14)-W(1)-N(2)  | 142.98(17) |
| Na(1)-Na(2) | 3.805(3) | C(16)-W(1)-N(12)   | 80.68(16)  | Na(2)-N(6)#4  | 2.469(5)  | C(13)-W(1)-N(2)  | 142.4(2)   |
| Na(3)-O(7)  | 2.347(4) | C(14)-W(1)-N(12)   | 143.19(17) | Na(2)-N(5A)   | 2.69(2)   | C(15)-W(1)-N(2)  | 79.5(2)    |
| Na(3)-O(9)  | 2.347(4) | C(13)-W(1)-N(12)   | 119.02(17) | Na(2)-O(1B)#2 | 2.787(10) | C(16)-W(1)-N(2)  | 78.33(18)  |

|               |          |                    |            |            |           |                      |            |
|---------------|----------|--------------------|------------|------------|-----------|----------------------|------------|
| Na(3)-O(8)    | 2.378(4) | C(18)#1-W(1)-N(12) | 75.01(17)  | O(1B)-O(5) | 1.572(13) | C(12)-W(1)-N(2)      | 75.41(17)  |
| Na(3)-N(35)#2 | 2.451(5) | C(17)-W(1)-N(12)   | 79.52(16)  |            |           | C(11)-W(1)-N(2)      | 120.14(19) |
| Na(3)-N(13)#1 | 2.481(5) | N(1)-W(1)-N(12)    | 72.02(14)  |            |           | N(1)-W(1)-N(2)       | 72.19(15)  |
| Na(3)-Na(4)#2 | 3.527(3) | C(36)-W(2)-C(37)   | 75.6(2)    |            |           | O(1A)-Na(1)-O(2)     | 139.7(4)   |
| Na(2)-O(6)    | 2.321(4) | C(36)-W(2)-C(35)   | 68.12(19)  |            |           | O(1A)-Na(1)-N(7)     | 91.0(3)    |
| Na(2)-O(3)    | 2.347(4) | C(37)-W(2)-C(35)   | 135.4(2)   |            |           | O(2)-Na(1)-N(7)      | 120.3(3)   |
| Na(2)-O(1)    | 2.374(4) | C(36)-W(2)-C(34)   | 79.90(18)  |            |           | O(1A)-Na(1)-N(3)#1   | 106.7(3)   |
| Na(2)-O(5)    | 2.440(4) | C(37)-W(2)-C(34)   | 69.49(17)  |            |           | O(2)-Na(1)-N(3)#1    | 96.9(3)    |
| Na(2)-O(4)    | 2.519(5) | C(35)-W(2)-C(34)   | 79.17(18)  |            |           | N(7)-Na(1)-N(3)#1    | 92.9(3)    |
| Na(2)-O(2)    | 2.625(5) | C(36)-W(2)-C(38)   | 71.17(18)  |            |           | O(2)-Na(1)-O(1B)     | 119.3(4)   |
| Na(4)-O(8)#3  | 2.391(4) | C(37)-W(2)-C(38)   | 75.65(19)  |            |           | N(7)-Na(1)-O(1B)     | 119.7(3)   |
| Na(4)-O(10)   | 2.430(5) | C(35)-W(2)-C(38)   | 114.10(19) |            |           | N(3)#1-Na(1)-O(1B)   | 88.2(3)    |
| Na(4)-N(14)   | 2.437(4) | C(34)-W(2)-C(38)   | 139.1(2)   |            |           | O(1A)-Na(1)-O(1A)#2  | 67.2(3)    |
| Na(4)-O(9)#3  | 2.450(4) | C(36)-W(2)-C(33)   | 110.05(19) |            |           | O(2)-Na(1)-O(1A)#2   | 83.6(3)    |
| Na(4)-N(36)   | 2.493(5) | C(37)-W(2)-C(33)   | 143.83(17) |            |           | N(7)-Na(1)-O(1A)#2   | 96.5(3)    |
| Na(4)-N(34)#4 | 2.528(5) | C(35)-W(2)-C(33)   | 75.23(18)  |            |           | N(3)#1-Na(1)-O(1A)#2 | 168.8(4)   |
| N(13)-C(13)   | 1.141(6) | C(34)-W(2)-C(33)   | 146.01(17) |            |           | O(1A)-Na(1)-C(15)    | 108.6(3)   |

|             |          |                  |            |  |  |                       |           |
|-------------|----------|------------------|------------|--|--|-----------------------|-----------|
| N(15)-C(15) | 1.156(7) | C(38)-W(2)-C(33) | 73.00(19)  |  |  | O(2)-Na(1)-C(15)      | 101.5(3)  |
| N(38)-C(38) | 1.152(6) | C(36)-W(2)-N(32) | 145.42(16) |  |  | N(7)-Na(1)-C(15)      | 18.9(2)   |
| N(32)-C(27) | 1.363(6) | C(37)-W(2)-N(32) | 78.60(18)  |  |  | N(3)#1-Na(1)-C(15)    | 94.0(3)   |
| N(32)-C(31) | 1.367(6) | C(35)-W(2)-N(32) | 144.28(18) |  |  | O(1B)-Na(1)-C(15)     | 138.6(3)  |
| N(21)-C(26) | 1.353(6) | C(34)-W(2)-N(32) | 111.93(16) |  |  | O(1A)#2-Na(1)-C(15)   | 96.9(3)   |
| N(21)-C(22) | 1.356(6) | C(38)-W(2)-N(32) | 80.44(17)  |  |  | O(1A)-Na(1)-Na(2)     | 109.0(3)  |
| N(34)-C(34) | 1.153(6) | C(33)-W(2)-N(32) | 78.83(17)  |  |  | O(2)-Na(1)-Na(2)      | 42.82(17) |
| N(35)-C(35) | 1.147(6) | C(36)-W(2)-N(21) | 141.89(16) |  |  | N(7)-Na(1)-Na(2)      | 104.6(2)  |
| N(36)-C(36) | 1.159(7) | C(37)-W(2)-N(21) | 120.68(17) |  |  | N(3)#1-Na(1)-Na(2)    | 139.6(2)  |
| N(37)-C(37) | 1.160(7) | C(35)-W(2)-N(21) | 78.84(17)  |  |  | O(1B)-Na(1)-Na(2)     | 112.5(3)  |
| N(33)-C(33) | 1.146(6) | C(34)-W(2)-N(21) | 75.63(16)  |  |  | O(1A)#2-Na(1)-Na(2)   | 42.84(19) |
| N(14)-C(14) | 1.146(6) | C(38)-W(2)-N(21) | 142.98(18) |  |  | C(15)-Na(1)-Na(2)     | 92.00(18) |
| N(16)-C(16) | 1.146(6) | C(33)-W(2)-N(21) | 77.77(16)  |  |  | O(1A)-Na(1)-Na(1)#2   | 37.1(2)   |
| N(17)-C(17) | 1.148(6) | N(32)-W(2)-N(21) | 71.94(15)  |  |  | O(2)-Na(1)-Na(1)#2    | 110.0(3)  |
| N(18)-C(18) | 1.131(6) | N(18)-Na(1)-O(2) | 91.50(16)  |  |  | N(7)-Na(1)-Na(1)#2    | 94.9(2)   |
|             |          | N(18)-Na(1)-O(1) | 157.81(15) |  |  | N(3)#1-Na(1)-Na(1)#2  | 143.0(3)  |
|             |          | O(2)-Na(1)-O(1)  | 80.12(15)  |  |  | O(1A)#2-Na(1)-Na(1)#2 | 30.05(19) |

|  |  |                   |            |  |  |                      |           |
|--|--|-------------------|------------|--|--|----------------------|-----------|
|  |  | N(18)-Na(1)-N(15) | 96.36(16)  |  |  | C(15)-Na(1)-Na(1)#2  | 104.6(2)  |
|  |  | O(2)-Na(1)-N(15)  | 165.48(18) |  |  | Na(2)-Na(1)-Na(1)#2  | 72.38(13) |
|  |  | O(1)-Na(1)-N(15)  | 88.13(15)  |  |  | N(5B)-Na(2)-O(3)     | 158.6(8)  |
|  |  | N(18)-Na(1)-N(38) | 103.17(16) |  |  | O(3)-Na(2)-O(1A)#2   | 76.7(3)   |
|  |  | O(2)-Na(1)-N(38)  | 99.81(15)  |  |  | N(5B)-Na(2)-N(4)#3   | 99.9(5)   |
|  |  | O(1)-Na(1)-N(38)  | 98.52(14)  |  |  | O(3)-Na(2)-N(4)#3    | 92.54(19) |
|  |  | N(15)-Na(1)-N(38) | 90.29(15)  |  |  | O(1A)#2-Na(2)-N(4)#3 | 89.6(2)   |
|  |  | N(18)-Na(1)-O(7)  | 75.30(14)  |  |  | N(5B)-Na(2)-O(2)     | 79.4(7)   |
|  |  | O(2)-Na(1)-O(7)   | 93.60(14)  |  |  | O(3)-Na(2)-O(2)      | 84.2(2)   |
|  |  | O(1)-Na(1)-O(7)   | 84.70(13)  |  |  | O(1A)#2-Na(2)-O(2)   | 75.6(2)   |
|  |  | N(15)-Na(1)-O(7)  | 76.72(13)  |  |  | N(4)#3-Na(2)-O(2)    | 165.2(2)  |
|  |  | N(38)-Na(1)-O(7)  | 166.55(16) |  |  | O(3)-Na(2)-N(6)#4    | 99.7(2)   |
|  |  | N(18)-Na(1)-Na(2) | 133.25(14) |  |  | O(1A)#2-Na(2)-N(6)#4 | 171.9(2)  |
|  |  | O(2)-Na(1)-Na(2)  | 43.14(11)  |  |  | N(4)#3-Na(2)-N(6)#4  | 97.91(18) |
|  |  | O(1)-Na(1)-Na(2)  | 37.54(10)  |  |  | O(2)-Na(2)-N(6)#4    | 96.8(2)   |
|  |  | N(15)-Na(1)-Na(2) | 125.67(13) |  |  | O(3)-Na(2)-N(5A)     | 172.1(5)  |
|  |  | N(38)-Na(1)-Na(2) | 96.72(12)  |  |  | N(4)#3-Na(2)-N(5A)   | 90.2(4)   |

|  |  |                       |            |  |  |                       |            |
|--|--|-----------------------|------------|--|--|-----------------------|------------|
|  |  | O(7)-Na(1)-Na(2)      | 93.74(10)  |  |  | O(2)-Na(2)-N(5A)      | 91.3(5)    |
|  |  | O(7)-Na(3)-O(9)       | 117.89(18) |  |  | N(6)#4-Na(2)-N(5A)    | 87.3(4)    |
|  |  | O(7)-Na(3)-O(8)       | 82.77(15)  |  |  | O(3)-Na(2)-O(1B)#2    | 100.2(2)   |
|  |  | O(9)-Na(3)-O(8)       | 84.06(14)  |  |  | O(1A)#2-Na(2)-O(1B)#2 | 27.3(3)    |
|  |  | O(7)-Na(3)-N(35)#2    | 115.80(16) |  |  | N(4)#3-Na(2)-O(1B)#2  | 74.9(2)    |
|  |  | O(9)-Na(3)-N(35)#2    | 126.23(17) |  |  | O(2)-Na(2)-O(1B)#2    | 91.5(3)    |
|  |  | O(8)-Na(3)-N(35)#2    | 100.04(16) |  |  | N(6)#4-Na(2)-O(1B)#2  | 159.0(2)   |
|  |  | O(7)-Na(3)-N(13)#1    | 92.17(16)  |  |  | N(5B)-Na(2)-Na(1)     | 71.5(7)    |
|  |  | O(9)-Na(3)-N(13)#1    | 95.91(15)  |  |  | O(3)-Na(2)-Na(1)      | 87.2(2)    |
|  |  | O(8)-Na(3)-N(13)#1    | 174.22(17) |  |  | O(1A)#2-Na(2)-Na(1)   | 42.15(19)  |
|  |  | N(35)#2-Na(3)-N(13)#1 | 84.66(16)  |  |  | N(4)#3-Na(2)-Na(1)    | 130.34(15) |
|  |  | O(7)-Na(3)-Na(4)#2    | 112.44(13) |  |  | O(2)-Na(2)-Na(1)      | 35.3(2)    |
|  |  | O(9)-Na(3)-Na(4)#2    | 43.81(10)  |  |  | N(6)#4-Na(2)-Na(1)    | 131.10(15) |
|  |  | O(8)-Na(3)-Na(4)#2    | 42.44(9)   |  |  | N(5A)-Na(2)-Na(1)     | 85.4(5)    |
|  |  | N(35)#2-Na(3)-Na(4)#2 | 110.73(13) |  |  | O(1B)#2-Na(2)-Na(1)   | 56.5(2)    |
|  |  | N(13)#1-Na(3)-Na(4)#2 | 138.85(12) |  |  | Na(1)-O(1A)-Na(1)#2   | 112.8(3)   |
|  |  | O(6)-Na(2)-O(3)       | 154.00(18) |  |  | Na(1)-O(1A)-Na(2)#2   | 149.5(4)   |

|  |  |                  |            |  |  |                       |           |
|--|--|------------------|------------|--|--|-----------------------|-----------|
|  |  | O(6)-Na(2)-O(1)  | 98.17(15)  |  |  | Na(1)#2-O(1A)-Na(2)#2 | 95.0(3)   |
|  |  | O(3)-Na(2)-O(1)  | 107.45(15) |  |  | O(5)-O(1B)-Na(1)      | 104.7(5)  |
|  |  | O(6)-Na(2)-O(5)  | 86.87(15)  |  |  | O(5)-O(1B)-Na(2)#2    | 143.8(5)  |
|  |  | O(3)-Na(2)-O(5)  | 86.19(15)  |  |  | Na(1)-O(1B)-Na(2)#2   | 111.2(4)  |
|  |  | O(1)-Na(2)-O(5)  | 115.30(17) |  |  | Na(1)-O(2)-Na(2)      | 101.9(3)  |
|  |  | O(6)-Na(2)-O(4)  | 73.55(15)  |  |  | C(14)-N(6)-Na(2)#4    | 162.9(4)  |
|  |  | O(3)-Na(2)-O(4)  | 81.53(15)  |  |  | C(15)-N(7)-Na(1)      | 120.5(6)  |
|  |  | O(1)-Na(2)-O(4)  | 152.41(18) |  |  | C(11)-N(3)-Na(1)#5    | 137.9(7)  |
|  |  | O(5)-Na(2)-O(4)  | 90.90(15)  |  |  | C(12)-N(4)-Na(2)#3    | 151.6(4)  |
|  |  | O(6)-Na(2)-O(2)  | 80.08(15)  |  |  | N(4)-C(12)-W(1)       | 178.2(5)  |
|  |  | O(3)-Na(2)-O(2)  | 100.30(15) |  |  | N(6)-C(14)-W(1)       | 177.8(4)  |
|  |  | O(1)-Na(2)-O(2)  | 78.76(14)  |  |  | N(8)-C(16)-W(1)       | 176.3(5)  |
|  |  | O(5)-Na(2)-O(2)  | 162.23(16) |  |  | N(7)-C(15)-W(1)       | 177.3(5)  |
|  |  | O(4)-Na(2)-O(2)  | 73.93(15)  |  |  | N(7)-C(15)-Na(1)      | 40.6(5)   |
|  |  | O(6)-Na(2)-Na(1) | 83.81(12)  |  |  | W(1)-C(15)-Na(1)      | 140.8(3)  |
|  |  | O(3)-Na(2)-Na(1) | 113.09(12) |  |  | N(3)-C(11)-W(1)       | 175.8(6)  |
|  |  | O(1)-Na(2)-Na(1) | 40.07(11)  |  |  | N(5B)-C(13)-W(1)      | 164.2(17) |

|  |  |                      |            |  |  |                   |           |
|--|--|----------------------|------------|--|--|-------------------|-----------|
|  |  | O(5)-Na(2)-Na(1)     | 151.13(12) |  |  | N(5A)-C(13)-W(1)  | 161.8(14) |
|  |  | O(4)-Na(2)-Na(1)     | 112.34(13) |  |  | C(13)-N(5A)-Na(2) | 123.0(18) |
|  |  | O(2)-Na(2)-Na(1)     | 39.24(10)  |  |  | C(13)-N(5B)-Na(2) | 169(2)    |
|  |  | O(8)#3-Na(4)-O(10)   | 83.50(14)  |  |  |                   |           |
|  |  | O(8)#3-Na(4)-N(14)   | 175.27(18) |  |  |                   |           |
|  |  | O(10)-Na(4)-N(14)    | 100.05(16) |  |  |                   |           |
|  |  | O(8)#3-Na(4)-O(9)#3  | 81.62(14)  |  |  |                   |           |
|  |  | O(10)-Na(4)-O(9)#3   | 87.70(16)  |  |  |                   |           |
|  |  | N(14)-Na(4)-O(9)#3   | 95.33(15)  |  |  |                   |           |
|  |  | O(8)#3-Na(4)-N(36)   | 82.85(14)  |  |  |                   |           |
|  |  | O(10)-Na(4)-N(36)    | 164.82(17) |  |  |                   |           |
|  |  | N(14)-Na(4)-N(36)    | 93.24(16)  |  |  |                   |           |
|  |  | O(9)#3-Na(4)-N(36)   | 83.76(16)  |  |  |                   |           |
|  |  | O(8)#3-Na(4)-N(34)#4 | 92.49(14)  |  |  |                   |           |
|  |  | O(10)-Na(4)-N(34)#4  | 94.27(16)  |  |  |                   |           |
|  |  | N(14)-Na(4)-N(34)#4  | 90.37(16)  |  |  |                   |           |
|  |  | O(9)#3-Na(4)-N(34)#4 | 173.55(15) |  |  |                   |           |



|  |  |                       |            |  |  |  |  |
|--|--|-----------------------|------------|--|--|--|--|
|  |  | N(36)-Na(4)-N(34)#4   | 92.94(16)  |  |  |  |  |
|  |  | O(8)#3-Na(4)-Na(3)#3  | 42.16(10)  |  |  |  |  |
|  |  | O(10)-Na(4)-Na(3)#3   | 94.45(12)  |  |  |  |  |
|  |  | N(14)-Na(4)-Na(3)#3   | 133.89(14) |  |  |  |  |
|  |  | O(9)#3-Na(4)-Na(3)#3  | 41.56(10)  |  |  |  |  |
|  |  | N(36)-Na(4)-Na(3)#3   | 70.89(12)  |  |  |  |  |
|  |  | N(34)#4-Na(4)-Na(3)#3 | 132.06(11) |  |  |  |  |
|  |  | Na(3)-O(7)-Na(1)      | 115.91(17) |  |  |  |  |
|  |  | Na(2)-O(1)-Na(1)      | 102.39(16) |  |  |  |  |
|  |  | Na(1)-O(2)-Na(2)      | 97.61(16)  |  |  |  |  |
|  |  | Na(3)-O(8)-Na(4)#2    | 95.39(13)  |  |  |  |  |
|  |  | Na(3)-O(9)-Na(4)#2    | 94.63(14)  |  |  |  |  |
|  |  | C(13)-N(13)-Na(3)#1   | 130.9(4)   |  |  |  |  |
|  |  | C(15)-N(15)-Na(1)     | 136.3(4)   |  |  |  |  |
|  |  | C(38)-N(38)-Na(1)     | 170.5(4)   |  |  |  |  |
|  |  | N(36)-Na(4)-N(34)#4   | 92.94(16)  |  |  |  |  |
|  |  | O(8)#3-Na(4)-Na(3)#3  | 42.16(10)  |  |  |  |  |

|  |  |                       |            |  |  |  |  |
|--|--|-----------------------|------------|--|--|--|--|
|  |  | O(10)-Na(4)-Na(3)#3   | 94.45(12)  |  |  |  |  |
|  |  | N(14)-Na(4)-Na(3)#3   | 133.89(14) |  |  |  |  |
|  |  | O(9)#3-Na(4)-Na(3)#3  | 41.56(10)  |  |  |  |  |
|  |  | N(36)-Na(4)-Na(3)#3   | 70.89(12)  |  |  |  |  |
|  |  | N(34)#4-Na(4)-Na(3)#3 | 132.06(11) |  |  |  |  |
|  |  | Na(3)-O(7)-Na(1)      | 115.91(17) |  |  |  |  |
|  |  | Na(2)-O(1)-Na(1)      | 102.39(16) |  |  |  |  |
|  |  | Na(1)-O(2)-Na(2)      | 97.61(16)  |  |  |  |  |
|  |  | Na(3)-O(8)-Na(4)#2    | 95.39(13)  |  |  |  |  |
|  |  | Na(3)-O(9)-Na(4)#2    | 94.63(14)  |  |  |  |  |
|  |  | C(13)-N(13)-Na(3)#1   | 130.9(4)   |  |  |  |  |
|  |  | C(15)-N(15)-Na(1)     | 136.3(4)   |  |  |  |  |
|  |  | C(38)-N(38)-Na(1)     | 170.5(4)   |  |  |  |  |

Symmetry transformations used to generate equivalent atoms for **1**:

#1  $-x+1, -y, -z+2$  #2  $x-1, y, z$  #3  $x+1, y, z$  #4  $-x+2, -y, -z+1$

Symmetry transformations used to generate equivalent atoms for **2**:

#1  $x-1, y, z$  #2  $-x+1, -y+1, -z+1$  #3  $-x+2, -y+1, -z+1$

#4  $-x+2, -y+2, -z+1$  #5  $x+1, y, z$

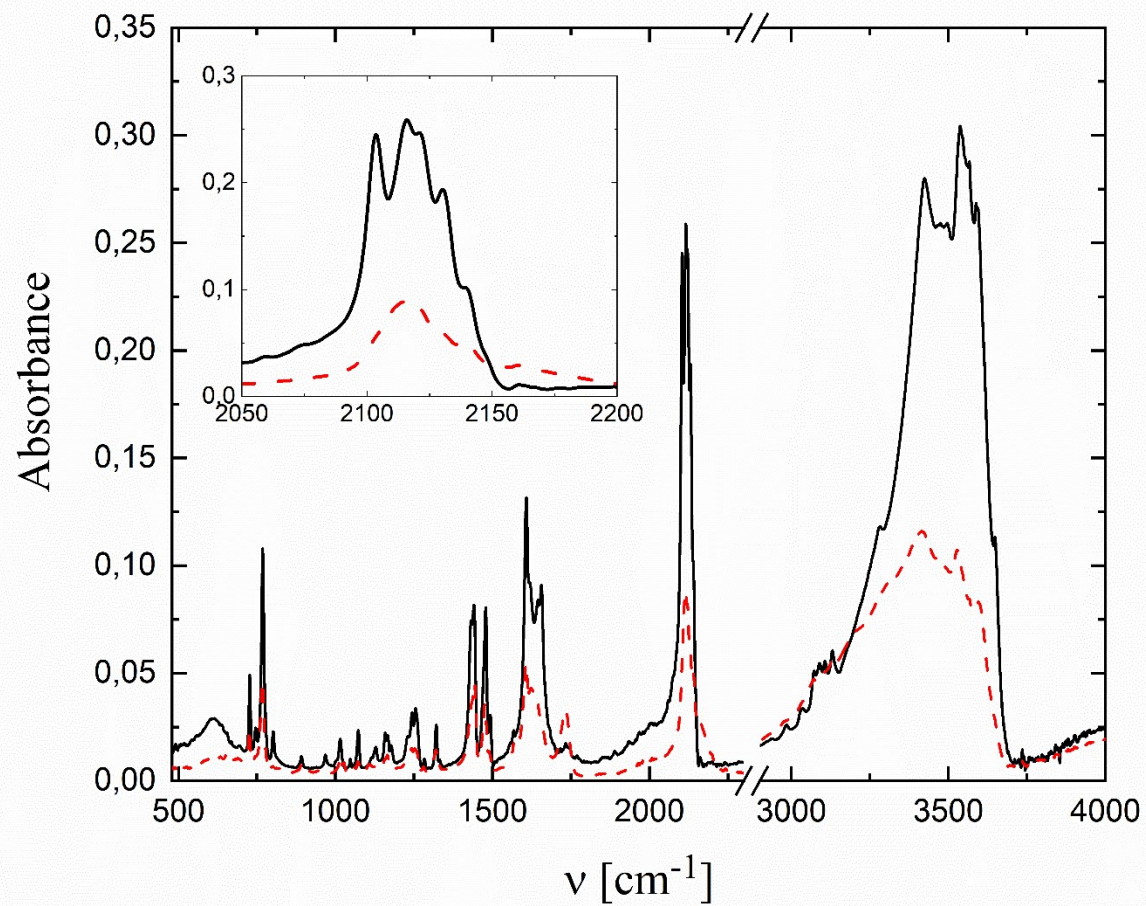

**Figure S1.** IR spectra for **1** (black, solid line) and **2** (red, dashed line).
